# Supplementary material
Source: publisher figshare collection journal article supplement (https://rs.figshare.com/ndownloader/files/22246488)
Supplement: Supplementary file 1 [file 22246488]

## Electronic supplementary material

Negative associations between parasite avoidance, resistance and tolerance predict host health in salmonid fish populations

Ines Klemme, Pekka Hyvärinen & Anssi Karvonen

Proceedings of the Royal Society B

### Supplementary tables

Table S1 Coordinates of the rivers of origin of 10 salmonid populations used in the experiment.

| River      | Basin           | Coordinates            |
|------------|-----------------|------------------------|
| Ii         | Gulf of Bothnia | 65°19'23"N, 25°21'30"E |
| Ingarskila | Gulf of Finland | 60°02'45"N, 24°00'20"E |
| Iso        | Gulf of Bothnia | 62°12'56"N, 21°25'27"E |
| Lesti      | Gulf of Bothnia | 64°04'22"N, 23°37'39"E |
| Musta      | Gulf of Finland | 60°48'19"N, 28°43'54"E |
| Neva       | Gulf of Finland | 59°57'50"N, 30°13'20"E |
| Oulu       | Gulf of Bothnia | 65°01'00"N, 25°27'00"E |
| Simo       | Gulf of Bothnia | 65°37'00"N, 25°03'00"E |
| Tornio     | Gulf of Bothnia | 65°48'30"N, 24°08'45"E |

Table S2 Sample sizes for all measured traits. Fish originated from two species and 10 genetically different populations.

| Species         | Population | Indirect avoidance | Direct avoidance | Resistance | Tolerance |
|-----------------|------------|--------------------|------------------|------------|-----------|
| Atlantic salmon | Ii         | 40                 | 24               | 89         | 86        |
|                 | Neva       | 17                 | 15               | 92         | 87        |
|                 | Oulu       | 43                 | 26               | 91         | 85        |
|                 | Simo       | 32                 | 27               | 92         | 87        |
|                 | Tornio     | 37                 | 30               | 95         | 94        |
| Sea trout       | Ii         | 36                 | 29               | 91         | 85        |
|                 | Ingarskila | 29                 | 29               | 85         | 78        |
|                 | Iso        | 36                 | 30               | 88         | 80        |
|                 | Lesti      | 30                 | 27               | 89         | 79        |
|                 | Musta      | 30                 | 28               | 89         | 83        |

Table S3 Setup of experimental exposures. Fish from two species and altogether 10 populations were exposed to seven parasite genotypes in 2-3 blocks per genotype. Each block contained the same number of fish from each population.

| Genotype | Block | Fish per population | Total no. of fish |
|----------|-------|---------------------|-------------------|
| 1        | 1     | 6                   | 60                |
|          | 2     | 6                   | 60                |
|          | 3     | 4                   | 40                |
| 2        | 1     | 6                   | 60                |
|          | 2     | 6                   | 60                |
|          | 3     | 4                   | 40                |
| 3        | 1     | 6                   | 60                |
|          | 2     | 6                   | 60                |
|          | 3     | 6                   | 60                |
| 4        | 1     | 6                   | 60                |
|          | 2     | 2                   | 20                |
| 5        | 1     | 6                   | 60                |
|          | 2     | 6                   | 60                |
| 6        | 1     | 6                   | 60                |
|          | 2     | 6                   | 60                |
| 7        | 1     | 6                   | 60                |
|          | 2     | 6                   | 60                |

Table S4 Loadings, eigenvalues and explained variance of the principal component analysis on boldness (latency to emergence from shelter) and exploration (number of grid crosses) for two rounds of personality tests.

| Variable      | Round 1 | Round 2 |
|---------------|---------|---------|
|               | PC 1    | PC 1    |
| Boldness      | -0.838  | -0.835  |
| Exploration   | 0.838   | 0.835   |
| Eigenvalue    | 1.40    | 1.39    |
| % of variance | 70.22   | 69.66   |

## Supplementary figures

Figure S1

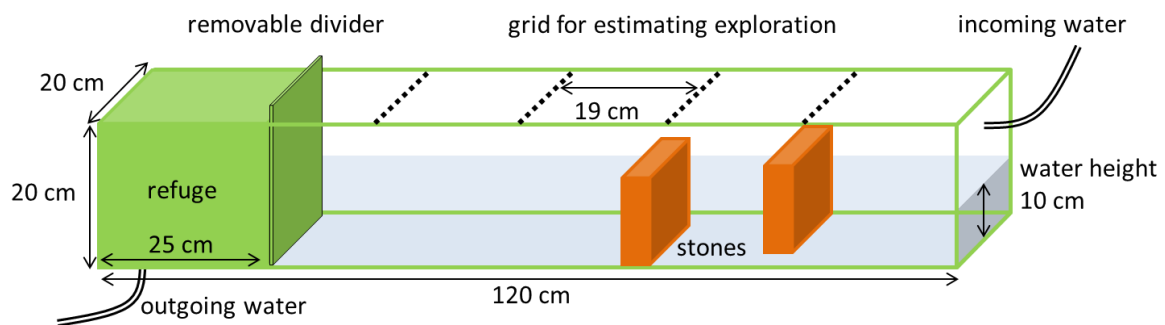

Experimental tank used for personality tests. Tanks consisted of a closed refuge at one end, while the rest of the tank was illuminated (800 lux). The open area contained two large stones in the opposite end of the refuge, which did not hinder fish movement, but prevented the view to the end of the tank. The open area was divided into five 19 cm zones using markings on the mesh lid covering the tank. Note that the whole tank was made of green opaque plastic and is presented transparent only for illustration purposes.

Figure S2

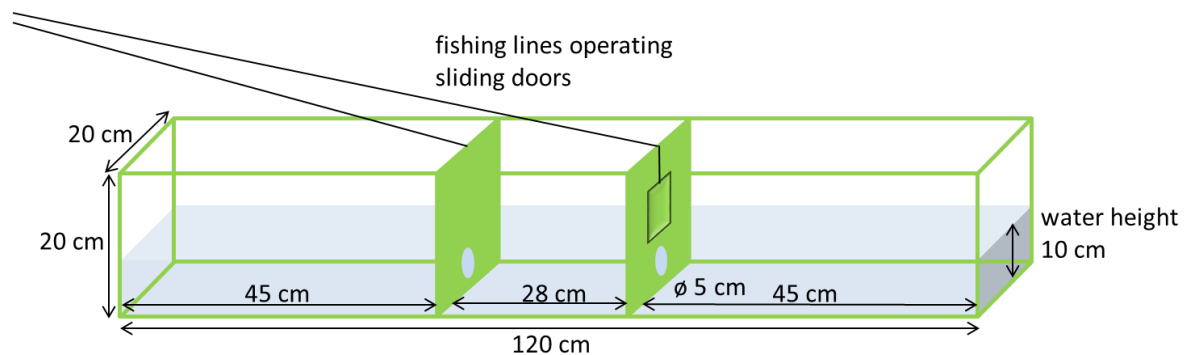

Experimental tank used for parasite avoidance tests. Note that the whole tank was made of green opaque plastic and is presented transparent only for illustration purposes.

Figure S3

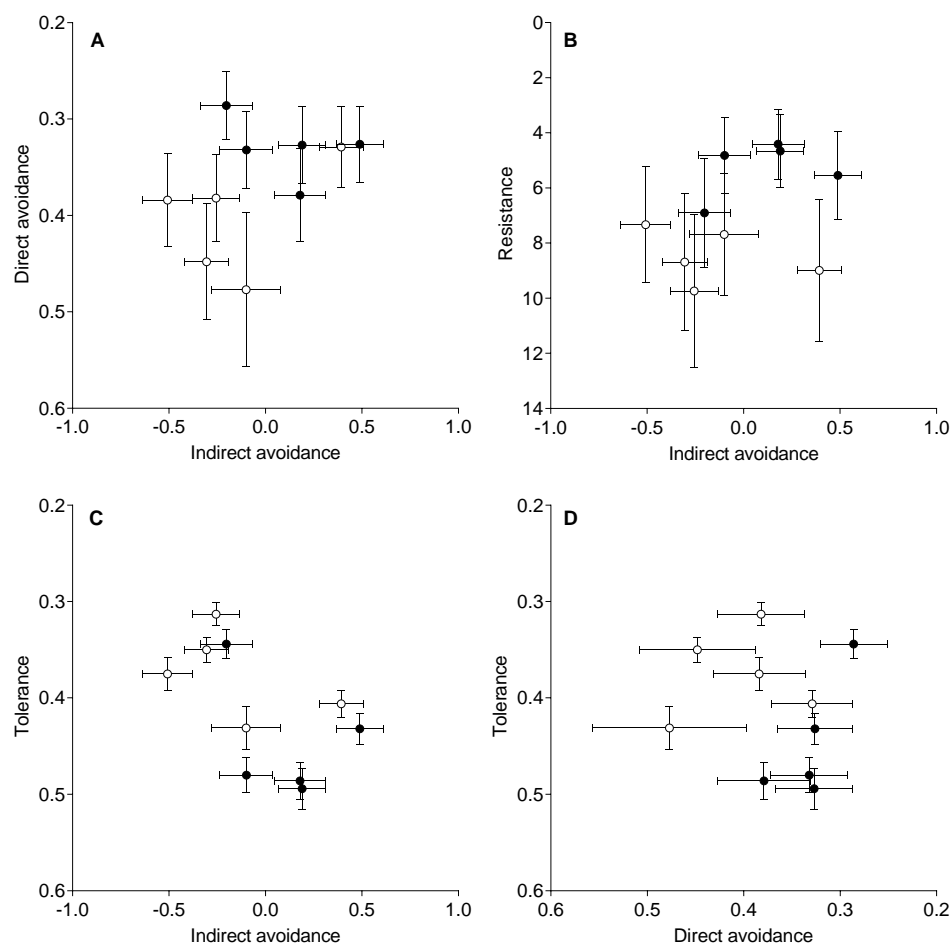

Associations between (A) indirect avoidance and direct avoidance, (B) indirect avoidance and resistance, (C) indirect avoidance and tolerance and (D) direct avoidance and tolerance in five populations of Atlantic salmon (open circles) and five populations of sea trout (filled circles). Note that the axes have been reversed for direct avoidance, resistance and tolerance to facilitate interpretation, i.e. for direct avoidance (proportion of time spent in the parasite compartment), resistance (parasite load) and tolerance (slope of cataract volume against parasite load) lower values indicate higher performance. For indirect avoidance (personality score) negative values represent relatively bold and fast exploring individuals and positive values relatively shy and slow exploring individuals.
